# Supplementary material
Source: PubMed Central journal article supplement (PMC2935519)
Supplement: NIHMS225672-supplement-Supporting_Info.pdf [file NIHMS225672-supplement-Supporting_Info.pdf]

Supporting Information for

Oxidation Reactions Performed by Soluble Methane

Monooxygenase Hydroxylase Intermediates  $H_{\text{peroxo}}$  and Q

Proceed by Distinct Mechanisms

*Christine E. Tinberg<sup>†</sup> and Stephen J. Lippard<sup>\*†</sup>*

Department of Chemistry, Massachusetts Institute of Technology, Cambridge, MA 02139

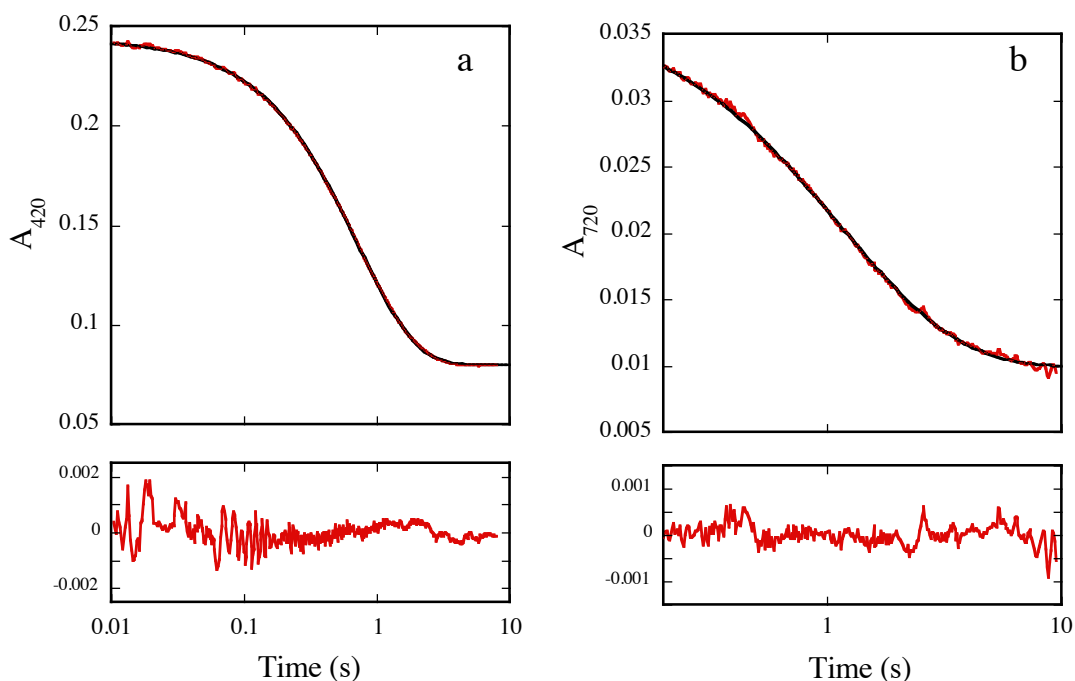

**Fig. S1.** Representative fits (black lines) of data (red lines) probing the reactions of Q (a) and  $H_{\text{peroxo}}$  (b) with 96 mM  $\text{CH}_3\text{NO}_2$  at 4 °C and pH 7.0. 200  $\mu\text{M}$   $\text{MMOH}_{\text{red}}$  and 400  $\mu\text{M}$   $\text{MMOB}$  were mixed rapidly with excess  $\text{O}_2$ , the reaction mixture was aged for 12 s (a) or 2 s (b), and then buffer containing 192 mM  $\text{CH}_3\text{NO}_2$  was introduced. Data probing the reaction with Q fit nicely to one exponential decay phase (a). Data monitoring the reaction with  $H_{\text{peroxo}}$  fit nicely to two exponential decay phases, where the rate constant for the second process was fixed at the value monitored in experiments probing the reaction with Q (b). Fit residuals are shown in the bottom plots. These results and fitting procedures are typical for all substrates employed unless otherwise noted.

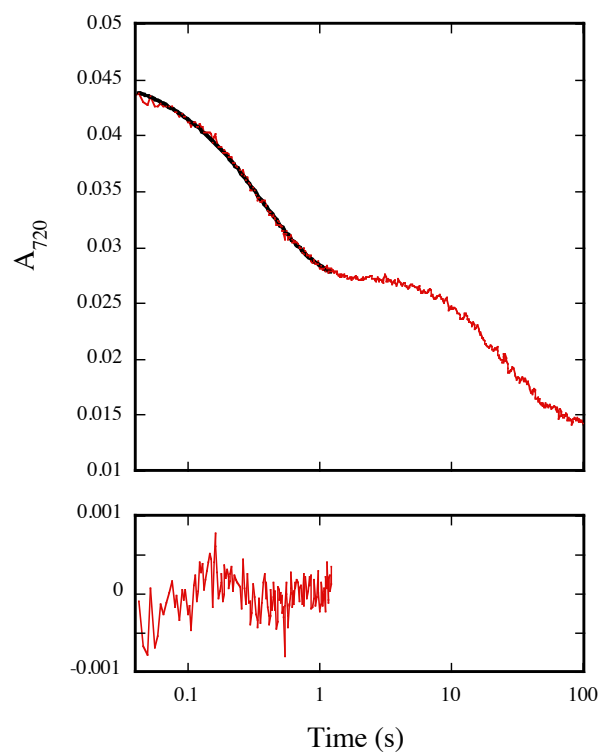

**Fig. S2.** Representative fit (black lines) of data (red lines) probing the reaction of  $H_{\text{peroxo}}$  with 272 mM  $CD_3NO_2$  at 4 °C and pH 7.0. 200  $\mu\text{M}$   $MMOH_{\text{red}}$  and 400  $\mu\text{M}$   $MMOB$  were mixed rapidly with excess  $O_2$ , the reaction mixture was aged for 2 s, and then buffer containing 544 mM  $CD_3NO_2$  was introduced. Because the exponential phases corresponding to  $H_{\text{peroxo}}$  and Q decay are well separated at  $[CD_3NO_2] > 200$  mM, the data were fit well by truncating and analyzing each phase separately using independent single exponential processes. Fit (top) and fit residuals (bottom) are shown here for the first,  $H_{\text{peroxo}}$ , reaction phase.

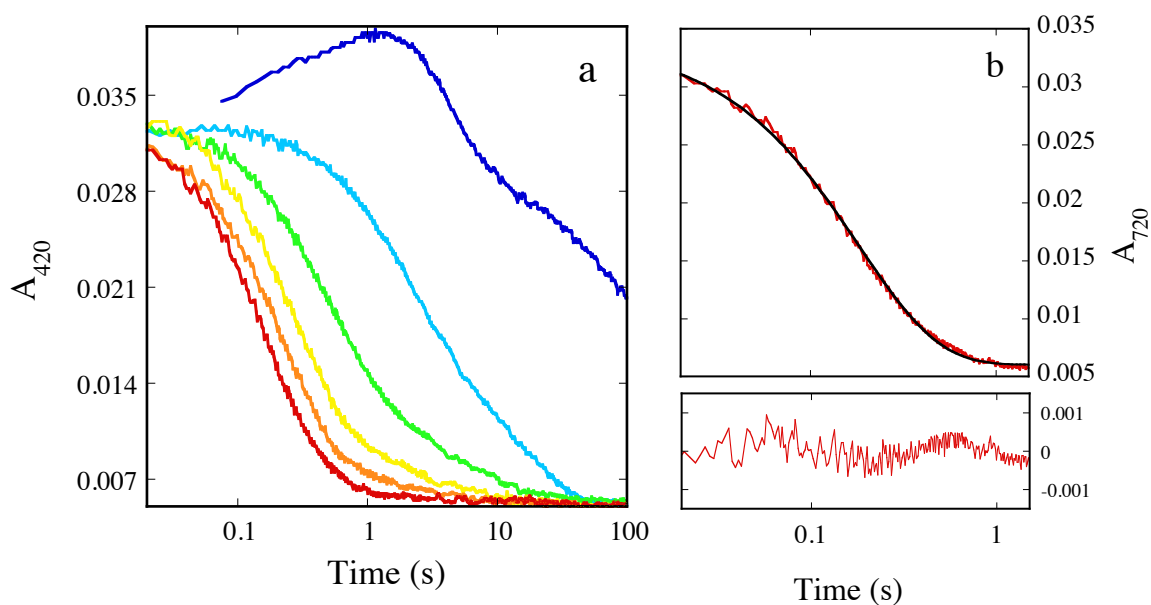

**Figure S3.** (a) Representative absorbance profile for the reaction of  $50 \mu\text{M}$   $\text{MMOH}_{\text{red}}$  with a mixture of excess  $\text{O}_2$  and  $\text{CH}_3\text{CH}_2\text{CHO}$  in the presence of 2 equiv  $\text{MMOB}$  at  $4^\circ\text{C}$  and  $720 \text{ nm}$ .  $[\text{CH}_3\text{CH}_2\text{CHO}] = 0 \text{ mM}$  (blue),  $5.8 \text{ mM}$  (cyan),  $24.9 \text{ mM}$  (green),  $69.7 \text{ mM}$  (yellow),  $122.3 \text{ mM}$  (orange), and  $214.9 \text{ mM}$  (red). Data collected on separate occasions with different batches of protein yielded similar results. (b) Representative fit of data (red line) depicted in (a) collected in the presence of  $214.9 \text{ mM}$   $\text{CH}_3\text{CH}_2\text{CHO}$  to a single exponential decay process (black line). Fit residuals are depicted below the plot.

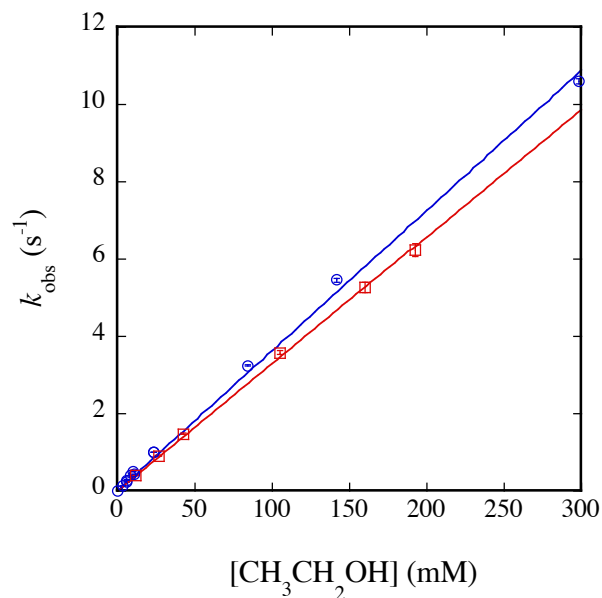

**Fig. S4.** Plot of  $k_{\text{obs}}$  versus  $[\text{CH}_3\text{CH}_2\text{OH}]$  (circles, blue line) or  $[\text{CD}_3\text{CD}_2\text{OH}]$  (squares, red line) for reaction with Q at 4 °C and pH 7.0. 200  $\mu\text{M}$   $\text{MMOH}_{\text{red}}$  and 400  $\mu\text{M}$   $\text{MMOB}$  were mixed rapidly with excess  $\text{O}_2$ , the reaction mixture was aged for 12 s, and then buffer containing the appropriate concentration of ethanol was introduced. Data were analyzed as noted in the text. Error bars represent one standard deviation at the 95% confidence level.

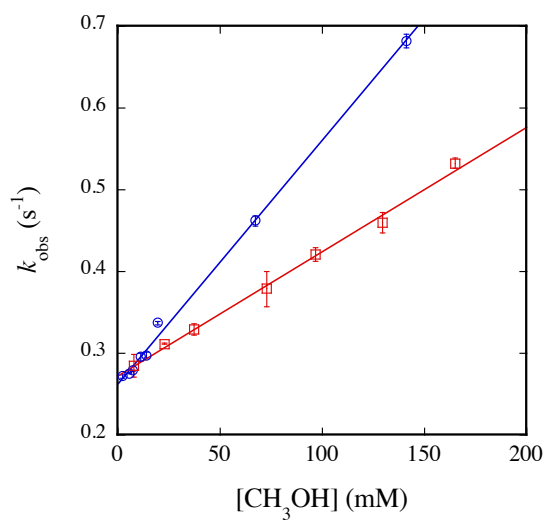

**Fig. S5.** Plot of  $k_{\text{obs}}$  versus  $[\text{CH}_3\text{OH}]$  (circles, blue line) or  $[\text{CD}_3\text{OH}]$  (squares, red line) for reaction with  $\text{H}_{\text{peroxo}}$  at 4 °C and pH 7.0. 200  $\mu\text{M}$   $\text{MMOH}_{\text{red}}$  and 400  $\mu\text{M}$   $\text{MMOB}$  were mixed rapidly with excess  $\text{O}_2$ , the reaction mixture was aged for 2 s, and then buffer containing the appropriate concentration of methanol was introduced. Data were analyzed as noted in the text. Error bars represent one standard deviation at the 95% confidence level.

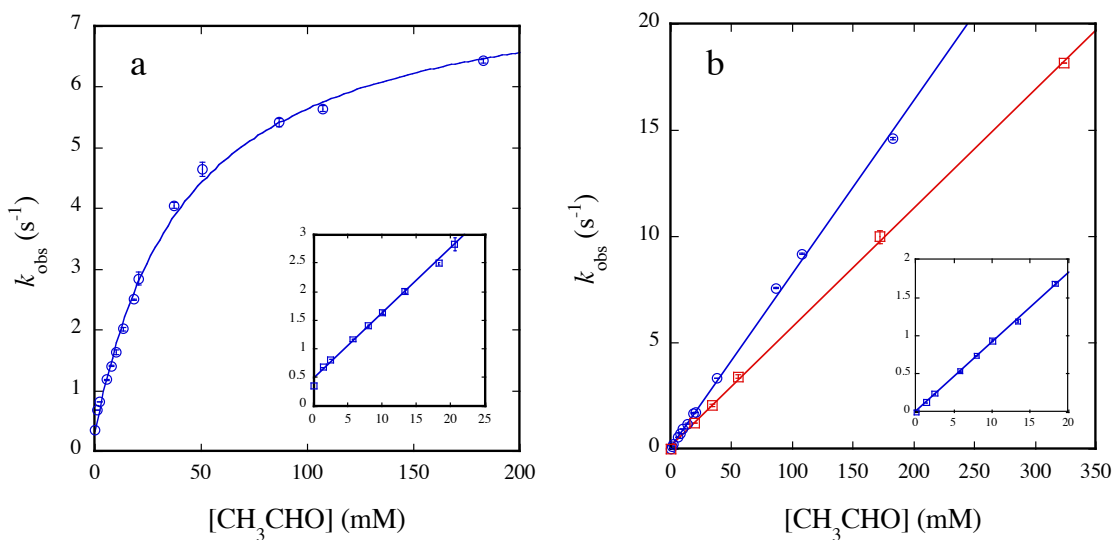

**Fig. S6.** Plot of  $k_{\text{obs}}$  versus  $[\text{CH}_3\text{CHO}]$  (circles, blue line) or  $[\text{CD}_3\text{CDO}]$  (squares, red line; inset) for reactions with  $\text{H}_{\text{peroxo}}$  (a) and Q (b) at 4 °C and pH 7.0. 200  $\mu\text{M}$   $\text{MMOH}_{\text{red}}$  and 400  $\mu\text{M}$   $\text{MMOB}$  were mixed rapidly with excess  $\text{O}_2$ , the reaction mixture was aged for 2 s ( $\text{H}_{\text{peroxo}}$ ) or 12 s (Q), and then buffer containing the appropriate concentration of acetaldehyde was introduced. Data were analyzed as noted in the text. Data collected at low  $[\text{CH}_3\text{CHO}]$  ( $k_{\text{init}}$ ) is depicted in the insets. Error bars represent one standard deviation at the 95% confidence level.

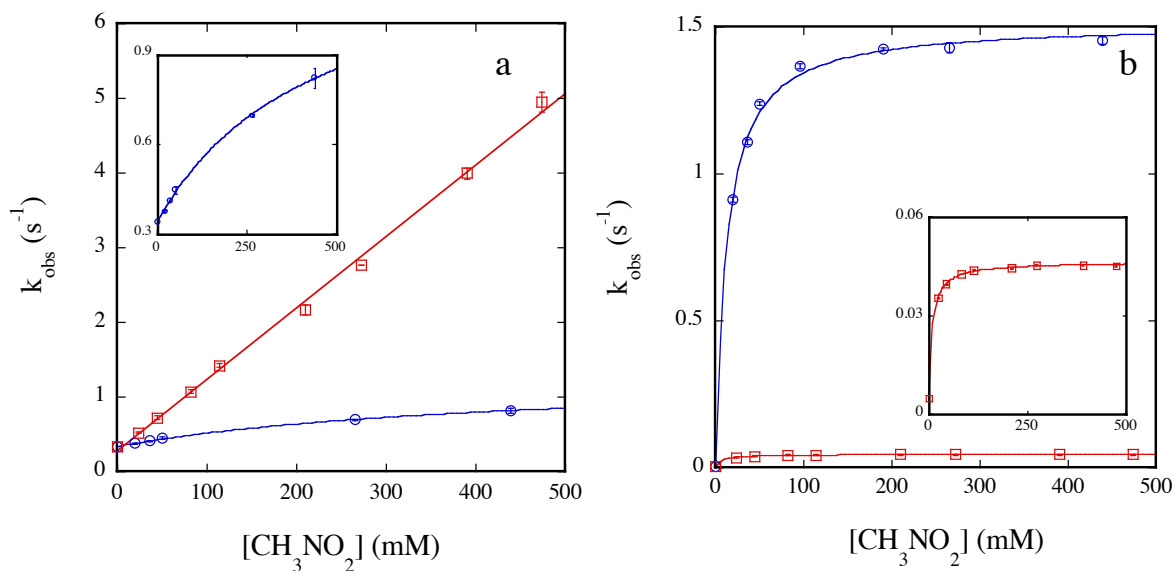

**Fig. S7.** Plot of  $k_{\text{obs}}$  versus  $[\text{CH}_3\text{NO}_2]$  (circles, blue line) or  $[\text{CD}_3\text{NO}_2]$  (squares, red line; inset) for reactions with  $\text{H}_{\text{peroxo}}$  (a) and  $\text{Q}$  (b) at 4 °C and pH 7.0. 200  $\mu\text{M}$   $\text{MMOH}_{\text{red}}$  and 400  $\mu\text{M}$   $\text{MMOB}$  were mixed rapidly with excess  $\text{O}_2$ , the reaction mixture was aged for 2 s ( $\text{H}_{\text{peroxo}}$ ) or 12 s ( $\text{Q}$ ), and then buffer containing the appropriate concentration of nitromethane was introduced. Data were analyzed as noted in the text. Insets show clearer plots of data displaying small rate constants. Error bars represent one standard deviation at the 95% confidence level.



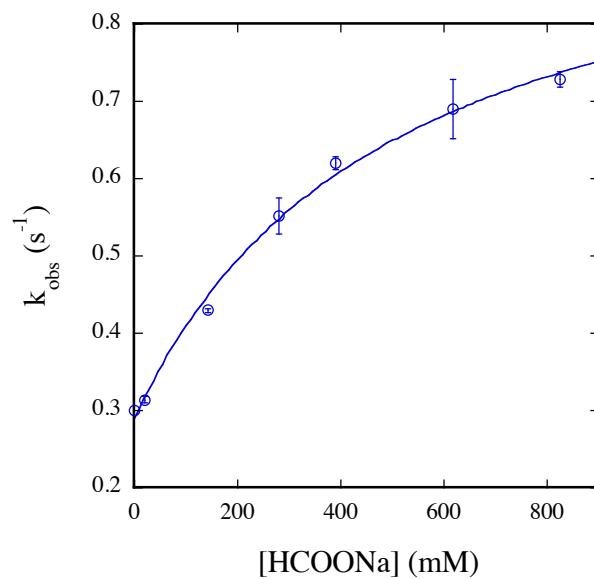

**Fig. S8.** Plot of  $k_{\text{obs}}$  versus [HCOONa] for reaction with  $\text{H}_{\text{peroxo}}$  at 4 °C and pH 7.0. 200  $\mu\text{M}$   $\text{MMOH}_{\text{red}}$  and 400  $\mu\text{M}$   $\text{MMOB}$  were mixed rapidly with excess  $\text{O}_2$ , the reaction mixture was aged for 2 s, and then buffer containing the appropriate concentration of sodium formate was introduced. Data were analyzed as noted in the text. Error bars represent one standard deviation at the 95% confidence level.

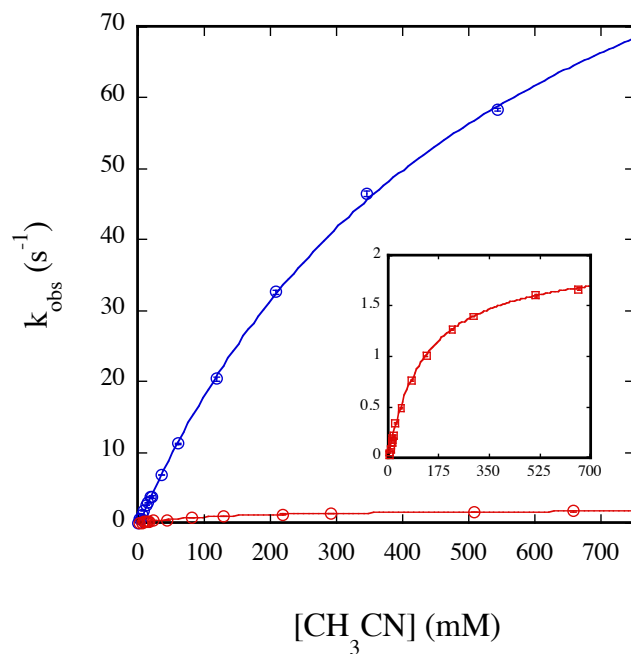

**Fig. S9.** Plot of  $k_{\text{obs}}$  versus  $[\text{CH}_3\text{CN}]$  (circles, blue line) or  $[\text{CD}_3\text{CN}]$  (squares, red line; inset) for reaction with Q at 4 °C and pH 7.0. 200  $\mu\text{M}$   $\text{MMOH}_{\text{red}}$  and 400  $\mu\text{M}$   $\text{MMOB}$  were mixed rapidly with excess  $\text{O}_2$ , the reaction mixture was aged for 12 s, and then buffer containing the appropriate concentration of acetonitrile was introduced. Data were analyzed as noted in the text. The inset shows a clearer plots of the  $[\text{CD}_3\text{CN}]$  data and fit. Error bars represent one standard deviation at the 95% confidence level.

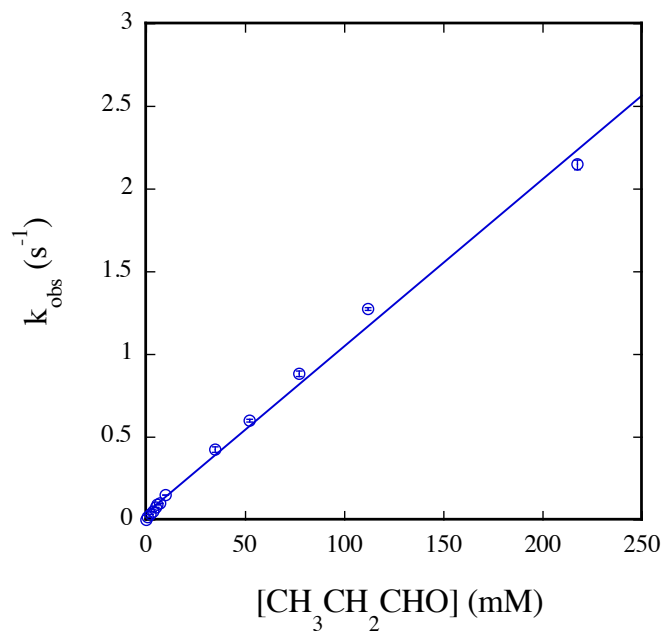

**Fig. S10.** Plot of  $k_{\text{obs}}$  versus  $[\text{CH}_3\text{CH}_2\text{CHO}]$  for reaction with Q at 4 °C and pH 7.0. 200  $\mu\text{M}$   $\text{MMOH}_{\text{red}}$  and 400  $\mu\text{M}$   $\text{MMOB}$  were mixed rapidly with excess  $\text{O}_2$ , the reaction mixture was aged for 12 s, and then buffer containing the appropriate concentration of propionaldehyde was introduced. Data were analyzed as noted in the text. Insets show clearer plots of data displaying small rate constants. Error bars represent one standard deviation at the 95% confidence level.
